# Supplementary material for: Grafting poly(4-vinylpyridine) onto gold nanorods toward functional plasmonic core–shell nanostructures
Source: Royal Society of Chemistry journal article supplement (doi:10.1039/c1jm13302k), 2011-01-01
Supplement: c1jm13302k.pdf [file c1jm13302k.pdf]

*Supporting information for*

**Grafting Poly(4-vinylpyridine) onto Gold Nanorods toward Functional Core-Shell  
Plasmonic Nanostructures**

DongXiang Li,<sup>ab</sup> Yu Jin Jang,<sup>a</sup> Jieun Lee,<sup>ac</sup> Ji-Eun Lee,<sup>a</sup> Saji Thomas Kochuveedu,<sup>a</sup> Dong  
Ha Kim<sup>a,\*</sup>

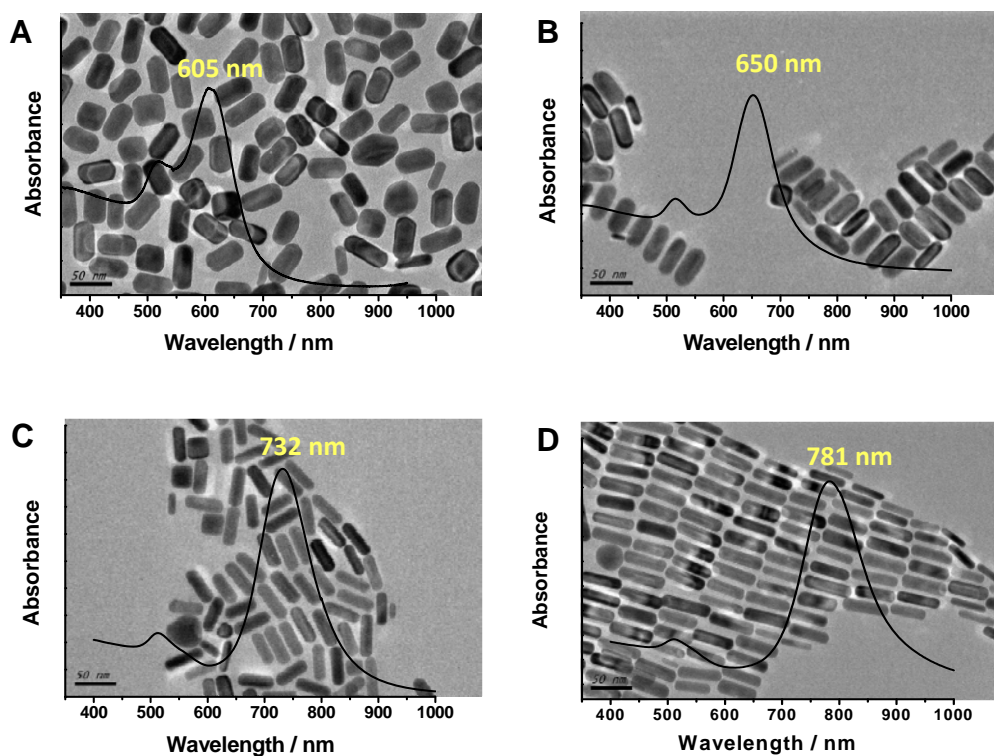

**Figure S1.** TEM images and UV-vis profiles of AuNRs synthesized by a seed-mediated growth method with adjustable aspect ratios of (A) 1.8, (B) 2.3, (C) 3.2 and (D) 4.0. The position of the longitude SPR mode's peak is marked in the figures.

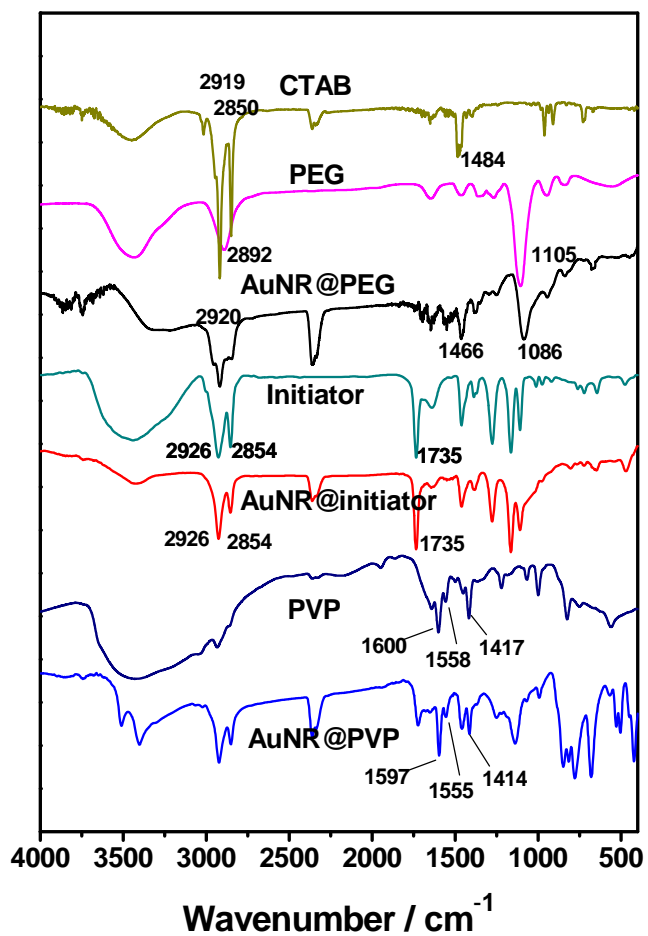

**Figure S2.** FT-IR spectra of pure CTAB, pure PEG, AuNR@PEG (containing CTAB), pure disulfide initiator, AuNR@initiator, pure PVP and AuNR@PVP samples (from up to down). The peaks around 2300-2400 in some of these samples are due to the absorbance of CO<sub>2</sub> in air.

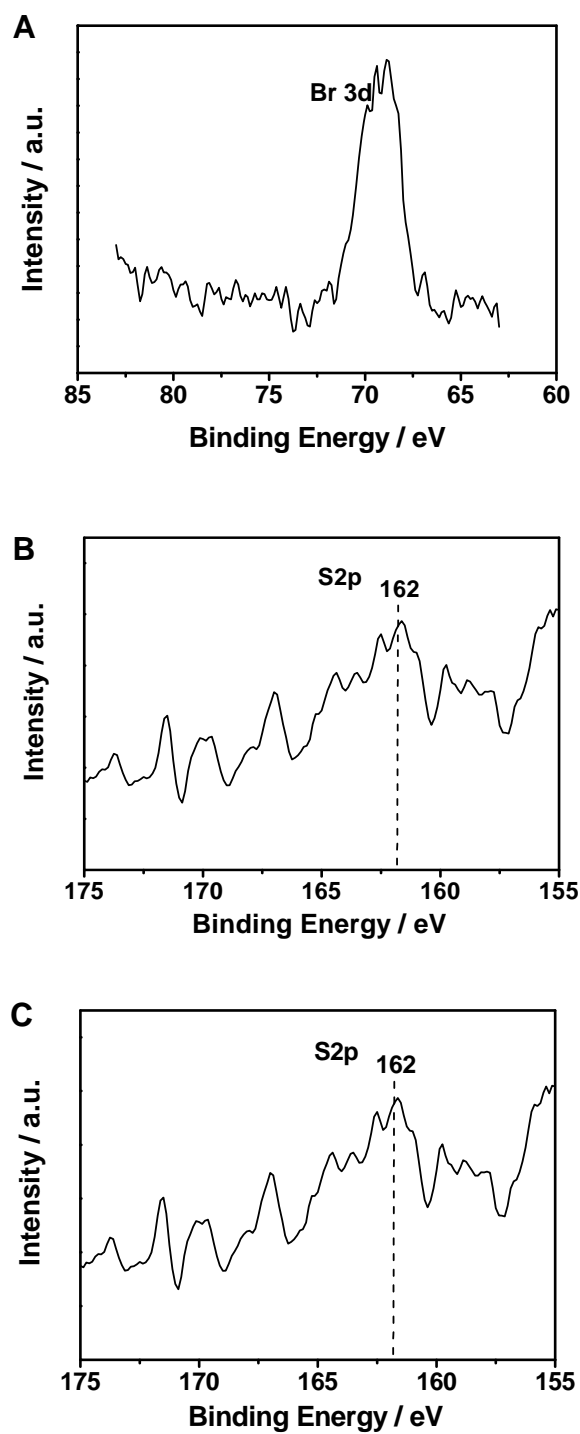

**Figure S3.** XPS spectra of Br<sub>3d</sub> of AuNR@PEG (A) and AuNR@initiator (B), and S<sub>2p</sub> of AuNR@initiator (C).
